# Supplementary material for: Tetranuclear lanthanide complexes display significant slow magnetic relaxation with an open hysteresis loop and the magnetocaloric effect
Source: Royal Society of Chemistry journal article supplement (doi:10.1039/d2qi02202h), 2023-01-01
Supplement: d2qi02202h1.pdf [file d2qi02202h1.pdf]

Supporting Information

**Tetranuclear lanthanide complexes display significant slow magnetic relaxation with open hysteresis loop and magnetocaloric effect**

Tian-Tian Wang,<sup>a</sup> Zi-Wei Che,<sup>a</sup> Ji-Tun Chen,<sup>a</sup> Han Yan,<sup>a</sup> Teng-Da Zhou,<sup>a</sup> Yi-Quan Zhang<sup>b</sup> and Wen-Bin Sun<sup>\*a</sup>

<sup>a</sup> Key Laboratory of Functional Inorganic Material Chemistry Ministry of Education, School of Chemistry and Material Science Heilongjiang University, 74 Xuefu Road, Harbin 150080, P. R. China. *E-mail:* [wenbinsun@126.com](mailto:wenbinsun@126.com)

<sup>b</sup> Jiangsu Key Laboratory for NSLSCS, School of Physical Science and Technology, Nanjing Normal University, Nanjing 210023, P. R. China. *E-mail:* [zhangyiquan@nju.edu.cn](mailto:zhangyiquan@nju.edu.cn)

**Table S1** Crystallographic data for complexes **1-3**.

|                                                             | <b>1</b>                                                                          | <b>2</b>                                                                          | <b>3</b>                                                                          |
|-------------------------------------------------------------|-----------------------------------------------------------------------------------|-----------------------------------------------------------------------------------|-----------------------------------------------------------------------------------|
| Empirical formula                                           | C <sub>100</sub> H <sub>100</sub> Dy <sub>4</sub> N <sub>12</sub> O <sub>22</sub> | C <sub>106</sub> H <sub>114</sub> Gd <sub>4</sub> N <sub>14</sub> O <sub>24</sub> | C <sub>322</sub> H <sub>372</sub> Y <sub>12</sub> N <sub>32</sub> O <sub>78</sub> |
| Formula weight                                              | 2471.91                                                                           | 2597.10                                                                           | 7005.32                                                                           |
| Crystal system                                              | trigonal                                                                          | trigonal                                                                          | trigonal                                                                          |
| Space group                                                 | R                                                                                 | R                                                                                 | R                                                                                 |
| Temperature (K)                                             | 212.95(10)                                                                        | 173                                                                               | 173(10)                                                                           |
| <i>a</i> (Å)                                                | 41.5368(11)                                                                       | 41.4910(8)                                                                        | 41.2845(9)                                                                        |
| <i>b</i> (Å)                                                | 41.5368(11)                                                                       | 41.4910(8)                                                                        | 41.2845(9)                                                                        |
| <i>c</i> (Å)                                                | 16.4686(6)                                                                        | 16.4542(3)                                                                        | 16.3767(5)                                                                        |
| $\alpha$ (°)                                                | 90                                                                                | 90                                                                                | 90                                                                                |
| $\beta$ (°)                                                 | 90                                                                                | 90                                                                                | 90                                                                                |
| $\gamma$ (°)                                                | 120                                                                               | 120                                                                               | 120                                                                               |
| <i>V</i> (Å <sup>3</sup> )                                  | 24606.7(16)                                                                       | 24531.0(10)                                                                       | 24173.1(14)                                                                       |
| $\rho_{\text{calc}}$ (Mg m <sup>-3</sup> )                  | 1.501                                                                             | 1.582                                                                             | 1.441                                                                             |
| $\mu$ (mm <sup>-1</sup> )                                   | 2.771                                                                             | 16.118                                                                            | 3.451                                                                             |
| <i>F</i> (000)                                              | 11016.0                                                                           | 11664.0                                                                           | 10824.0                                                                           |
| Collected reflections                                       | 28613                                                                             | 36627                                                                             | 59106                                                                             |
| Independent reflections                                     | 9590                                                                              | 9676                                                                              | 9596                                                                              |
| <i>R</i> <sub>int</sub>                                     | 0.1115                                                                            | 0.0663                                                                            | 0.0723                                                                            |
| <i>R</i> <sub>1</sub> [ <i>I</i> > 2 $\sigma$ ( <i>I</i> )] | 0.0647                                                                            | 0.0512                                                                            | 0.0596                                                                            |
| <i>wR</i> <sub>2</sub> (all data)                           | 0.1801                                                                            | 0.1455                                                                            | 0.1921                                                                            |
| Goodness of fit on <i>F</i> <sup>2</sup>                    | 1.030                                                                             | 1.016                                                                             | 1.030                                                                             |
| CCDC number                                                 | 2208476                                                                           | 2208475                                                                           | 2226681                                                                           |

**Table S2** Selected bond lengths (Å) and angles (°) for complexes **1** and **3**.

|            |            |             |            |
|------------|------------|-------------|------------|
| Dy2-Dy1    | 3.8102(5)  | Dy1-Dy1'    | 3.8094(7)  |
| Dy2-O4     | 2.296(5)   | Dy1-O1      | 2.305(5)   |
| Dy2-O6     | 2.337(5)   | Dy1-O1'     | 2.314(5)   |
| Dy2-O3     | 2.243(5)   | Dy1-O4      | 2.412(5)   |
| Dy2-O7     | 2.308(5)   | Dy1-O6      | 2.386(5)   |
| Dy2-N1     | 2.533(7)   | Dy1-O8      | 2.489(5)   |
| Dy2-N4     | 2.565(6)   | Dy1-O10     | 2.401(5)   |
| Dy2-N6     | 2.505(6)   | Dy1-O11     | 2.432(6)   |
| Dy2-N3     | 2.498(6)   | Dy1-O2      | 2.260(5)   |
| O4-Dy2-Dy1 | 37.02(11)  | O1-Dy1-O8   | 74.27(18)  |
| O4-Dy2-O6  | 73.67(17)  | O1'-Dy1-O8  | 78.46(18)  |
| O4-Dy2-O7  | 83.73(17)  | O1-Dy1-O10  | 89.47(18)  |
| O4-Dy2-N6  | 74.11(19)  | O1'-Dy1-O11 | 130.89(18) |
| O4-Dy2-N3  | 145.41(19) | O4-Dy1-Dy2  | 34.97(11)  |
| O6-Dy2-Dy1 | 36.66(12)  | O4-Dy1-Dy1' | 99.35(11)  |

|              |             |              |            |
|--------------|-------------|--------------|------------|
| O6-Dy2-N1    | 119.82(19)  | O4-Dy1-O8    | 115.33(18) |
| O6-Dy2-N4    | 145.7(2)    | O4-Dy1-O11   | 75.50(18)  |
| O6-Dy2-N6    | 145.2(2)    | O6-Dy1-Dy2   | 35.78(11)  |
| O6-Dy2-N3    | 74.70(19)   | O6-Dy1-Dy1'  | 155.25(11) |
| O3-Dy2-Dy1   | 82.27(15)   | O6-Dy1-O4    | 70.75(16)  |
| O3-Dy2-O4    | 83.17(19)   | O6-Dy1-O8    | 131.31(17) |
| O3-Dy2-O6    | 83.9(18)    | O6-Dy1-O10   | 75.53(18)  |
| O3-Dy2-O7    | 160.2(2)    | O6-Dy1-O11   | 86.87(18)  |
| O3-Dy2-N1    | 71.0(2)     | O8-Dy1-Dy2   | 132.07(14) |
| O3-Dy2-N4    | 129.0(2)    | O8-Dy1-Dy1'  | 73.41(13)  |
| O3-Dy2-N6    | 79.5(2)     | O10-Dy1-Dy2  | 73.31(13)  |
| O3-Dy2-N3    | 107.0(2)    | O10-Dy1-Dy1' | 80.26(14)  |
| O7-Dy2-Dy1   | 78.36(13)   | O10-Dy1-O4   | 77.90(17)  |
| O7-Dy2-N4    | 70.3(2)     | O11-Dy1-Dy2  | 79.49(14)  |
| O7-Dy2-N6    | 110.9(2)    | O11-Dy1-Dy1' | 113.19(14) |
| O7-Dy2-N3    | 76.5(2)     | O11-Dy1-O8   | 52.9(2)    |
| N1-Dy2-Dy1   | 147.57(14)  | O2-Dy1-Dy2   | 105.99(13) |
| N1-Dy2-N4    | 71.4(2)     | O2-Dy1-Dy1'  | 118.51(13) |
| N4-Dy2-Dy1   | 141.04(14)  | O2-Dy1-O1'   | 85.33(18)  |
| N3-Dy2-Dy1   | 110.19(14)  | O2-Dy1-O8    | 87.04(19)  |
| N3-Dy2-N6    | 139.6(2)    | Dy1-O1-Dy1'  | 111.2(2)   |
| Dy1'-Dy1-Dy2 | 130.507(15) | O1-Dy1-O1'   | 68.90(19)  |
| O1-Dy1-Dy2   | 103.51(13)  | O1'-Dy1-O4   | 128.90(16) |
| O1'-Dy1-Dy2  | 146.85(12)  | O1-Dy1-O4    | 68.79(17)  |
| O1'-Dy1-Dy1' | 34.38(11)   | O1'-Dy1-O6   | 138.06(16) |
| O1-Dy1-Dy1'  | 34.52(12)   | O1-Dy1-O6    | 138.94(17) |
| <hr/>        |             |              |            |
| Y1-Y1'       | 3.7886(9)   | Y1-O1'       | 2.306(3)   |
| Y1-Y2        | 3.7970(6)   | Y2-O3        | 2.235(3)   |
| Y1-O2        | 2.266(3)    | Y2-O4        | 2.296(3)   |
| Y1-O4        | 2.406(3)    | Y2-O6        | 2.328(3)   |
| Y1-O6        | 2.382(3)    | Y2-O7        | 2.305(3)   |
| Y1-O8        | 2.478(4)    | Y2-N1        | 2.512(4)   |
| Y1-O10       | 2.370(3)    | Y2-N3        | 2.497(4)   |
| Y1-O11       | 2.409(3)    | Y2-N4        | 2.553(4)   |
| Y1-O1        | 2.299(3)    | Y2-N6        | 2.487(4)   |
| Y1'-Y1-Y2    | 130.578(19) | O3-Y2-Y1     | 82.10(9)   |
| O2-Y1-Y1'    | 118.51(9)   | O3-Y2-O4     | 83.09(12)  |
| O2-Y1-Y2     | 105.94(9)   | O3-Y2-O6     | 83.59(12)  |
| O2-Y1-O10    | 97.39(12)   | O3-Y2-O7     | 159.26(13) |
| O2-Y1-O11    | 97.12(13)   | O3-Y2-N1     | 71.30(14)  |

|            |            |           |            |
|------------|------------|-----------|------------|
| O2-Y1-O1   | 150.63(12) | O3-Y2-N3  | 106.97(13) |
| O2-Y1-O1'  | 85.14(12)  | O3-Y2-N4  | 129.69(14) |
| O2-Y1-C6   | 96.42(15)  | O3-Y2-N6  | 79.53(14)  |
| O4-Y1-Y1'  | 99.16(8)   | O4-Y2-Y1  | 37.15(8)   |
| O4-Y1-Y2   | 35.18(7)   | O4-Y2-O6  | 73.90(11)  |
| O6-Y1-O8   | 131.16(12) | O4-Y2-O7  | 83.21(12)  |
| O6-Y1-O1'  | 86.71(12)  | O4-Y2-N1  | 148.37(13) |
| O6-Y1-C6   | 111.30(15) | O4-Y2-N3  | 145.85(13) |
| O8-Y1-Y1'  | 73.25(9)   | O4-Y2-N4  | 114.80(12) |
| O8-Y1-Y2   | 132.18(10) | O4-Y2-N6  | 74.28(13)  |
| O8-Y1-C6   | 27.20(15)  | O6-Y2-Y1  | 36.76(8)   |
| O10-Y1-Y1' | 80.59(9)   | O6-Y2-N1  | 119.68(13) |
| O10-Y1-Y2  | 73.05(9)   | O6-Y2-N3  | 74.95(12)  |
| O10-Y1-O4  | 77.67(12)  | O6-Y2-N4  | 145.24(13) |
| O10-Y1-O6  | 75.52(12)  | O6-Y2-N6  | 145.43(13) |
| O11-Y1-O8  | 52.91(13)  | O7-Y2-Y1  | 77.57(9)   |
| O11-Y1-C6  | 26.29(15)  | O7-Y2-O6  | 77.69(12)  |
| O1'-Y1-Y1' | 34.59(8)   | O7-Y2-N1  | 126.15(13) |
| O1-Y1-Y1'  | 34.72(8)   | O7-Y2-N3  | 76.80(13)  |
| O1'-Y1-Y2  | 146.88(9)  | O7-Y2-N4  | 70.53(14)  |
| O1-Y1-Y2   | 103.40(8)  | O7-Y2-N6  | 111.45(14) |
| O1-Y1-O4   | 68.47(11)  | N1-Y2-Y1  | 147.67(10) |
| O1'-Y1-O4  | 128.86(11) | N1-Y2-N4  | 71.65(14)  |
| O1-Y1-O6   | 138.94(11) | N3-Y2-Y1  | 110.51(10) |
| O1'-Y1-O6  | 138.06(11) | N3-Y2-N1  | 62.54(14)  |
| O1'-Y1-O8  | 78.40(13)  | N3-Y2-N4  | 84.28(13)  |
| O1-Y1-O8   | 74.14(12)  | N4-Y2-Y1  | 140.66(10) |
| O1-Y1-O10  | 89.79(12)  | N6-Y2-Y1  | 110.52(10) |
| O1'-Y1-O10 | 74.64(12)  | N6-Y2-N1  | 82.88(14)  |
| O1'-Y1-O11 | 130.88(13) | N6-Y2-N3  | 138.96(14) |
| O1-Y1-O11  | 89.39(12)  | O1-Y1-O1' | 69.31(13)  |

**Table S3** Selected bond lengths (Å) and angles (°) for complex **2**.

|        |          |                     |          |
|--------|----------|---------------------|----------|
| Gd2-O1 | 2.365(4) | Gd1-O1              | 2.414(4) |
| Gd2-O3 | 2.331(4) | Gd1-O2              | 2.350(4) |
| Gd2-O5 | 2.284(4) | Gd1-O2 <sup>1</sup> | 2.331(4) |
| Gd2-O9 | 2.345(4) | Gd1-O3              | 2.437(4) |
| Gd2-N1 | 2.552(5) | Gd1-O4              | 2.308(4) |
| Gd2-N2 | 2.519(5) | Gd1-O6              | 2.430(4) |
| Gd2-N3 | 2.519(5) | Gd1-O7              | 2.509(4) |

|           |            |              |            |
|-----------|------------|--------------|------------|
| Gd2-N4    | 2.583(5)   | Gd1-O8       | 2.463(4)   |
| O1-Gd2-N1 | 118.88(14) | N2-Gd2-N4    | 85.23(16)  |
| O1-Gd2-N2 | 74.11(15)  | N3-Gd2-N1    | 83.64(16)  |
| O1-Gd2-N3 | 145.48(16) | N3-Gd2-N4    | 62.82(18)  |
| O1-Gd2-N4 | 145.61(16) | O1-Gd1-Gd1'  | 155.23(9)  |
| O3-Gd2-O1 | 74.65(13)  | O1-Gd1-O3    | 71.90(13)  |
| O3-Gd2-O9 | 83.53(14)  | O1-Gd1-O6    | 75.09(14)  |
| O3-Gd2-N1 | 148.13(15) | O1-Gd1-O7    | 131.94(14) |
| O3-Gd2-N2 | 145.91(15) | O1-Gd1-O8    | 87.16(14)  |
| O3-Gd2-N3 | 73.52(15)  | O2-Gd1-Gd1'  | 34.52(9)   |
| O3-Gd2-N4 | 114.34(15) | O2'-Gd1-Gd1' | 34.84(9)   |
| O5-Gd2-O1 | 83.75(14)  | O2'-Gd1-O1   | 137.86(13) |
| O5-Gd2-O3 | 83.22(14)  | O2-Gd1-O1    | 138.74(13) |
| O5-Gd2-O9 | 160.01(15) | O2'-Gd1-O2   | 69.36(15)  |
| O5-Gd2-N1 | 70.82(15)  | O2'-Gd1-O3   | 128.41(13) |
| O5-Gd2-N2 | 106.51(15) | O2-Gd1-O3    | 67.46(13)  |
| O5-Gd2-N3 | 79.58(16)  | O2-Gd1-O6    | 89.17(15)  |
| O5-Gd2-N4 | 129.11(16) | O2'-Gd1-O6   | 75.27(14)  |
| O9-Gd2-O1 | 78.34(14)  | O2'-Gd1-O7   | 78.55(15)  |
| O9-Gd2-N1 | 126.04(16) | O2-Gd1-O7    | 73.23(15)  |
| O9-Gd2-N2 | 77.14(16)  | O2-Gd1-O8    | 89.48(15)  |
| O9-Gd2-N3 | 110.74(17) | O2'-Gd1-O8   | 130.63(14) |
| O9-Gd2-N4 | 70.32(16)  | O3-Gd1-Gd1'  | 98.18(9)   |
| N1-Gd2-N4 | 72.02(16)  | O3-Gd1-O7    | 113.49(15) |
| N2-Gd2-N1 | 62.49(16)  | O3-Gd1-O8    | 75.58(13)  |
| N2-Gd2-N3 | 139.74(16) | O4-Gd1-Gd1'  | 119.49(10) |

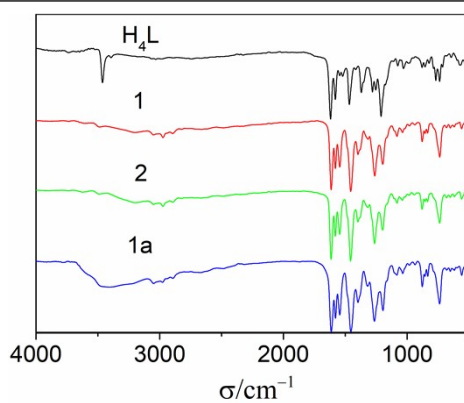

**Fig. S1** Infrared spectra for H<sub>4</sub>L, **1**, **2** and **1a**.

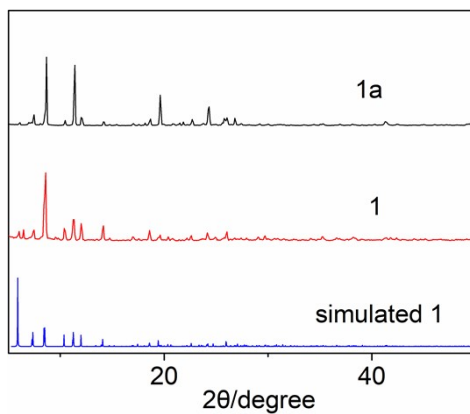

**Fig. S2** Experimental and simulated X-ray powder diffraction patterns for **1** and **1a**.

As shown in Fig. S2, the data are slight inconsistencies between experimental and simulated X-ray powder diffraction patterns before 10 degrees, this is probably because there are still solvent molecules that have not been identified (the task of fully identifying solvent molecules in the lattice is not easy). In addition, due to the presence of solvent molecules in the complex, some of them may be lost during the PXRD testing process, which most likely lead to some difference between the experimental and simulated results.

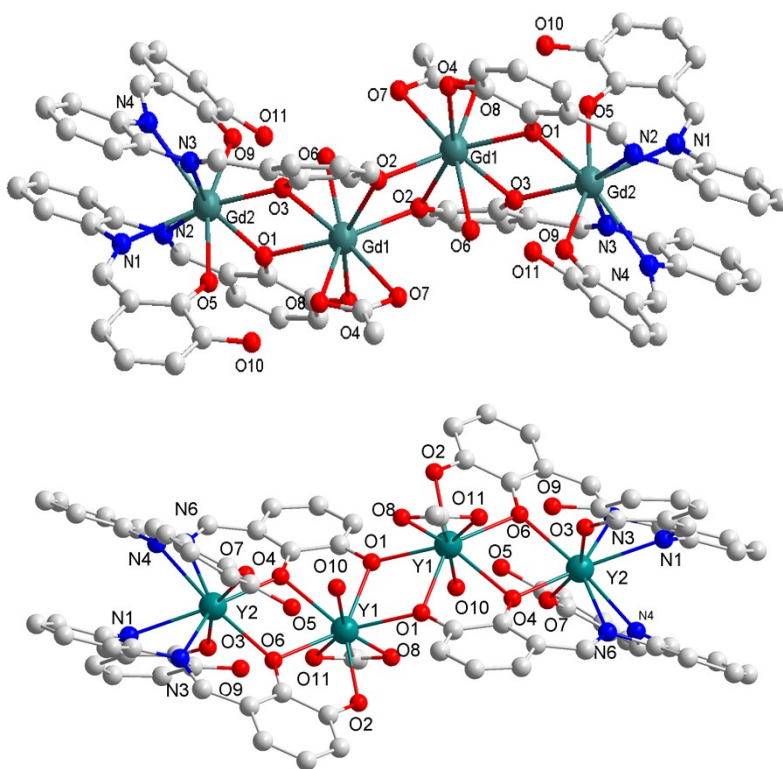

**Fig. S3** Structure of complexes **2** and **3**.

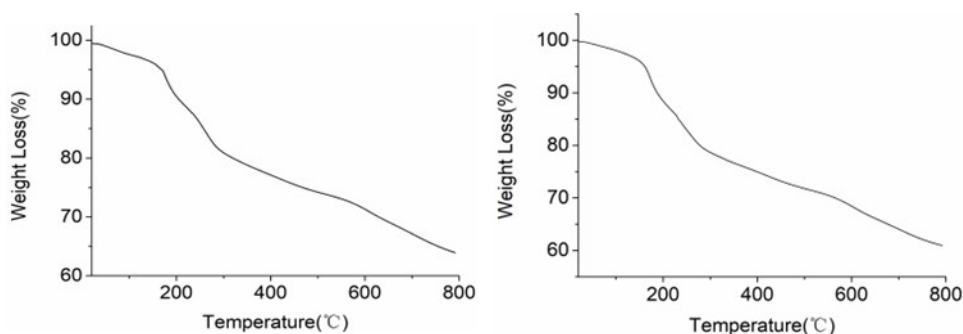

**Fig. S4** TG curves of complexes **1** (left) and **2** (right).

Crystals of **1** and **2** have been selected for the thermogravimetric analysis in the experimental range of 20–800 degree. For **1**, the initial phase may be due to the loss of two acetonitrile molecules before 140 degree (found as 3.4 wt%, calculated as 3.3 wt%), which is consistent with the electron counts obtained by SQUEEZE. For **2**, the initial phase may be due to the loss of four acetonitrile molecules and two methanol molecules before 180 degree (found as 8.7 wt%, calculated as 8.8 wt%), which is consistent with the electron counts obtained by SQUEEZE.

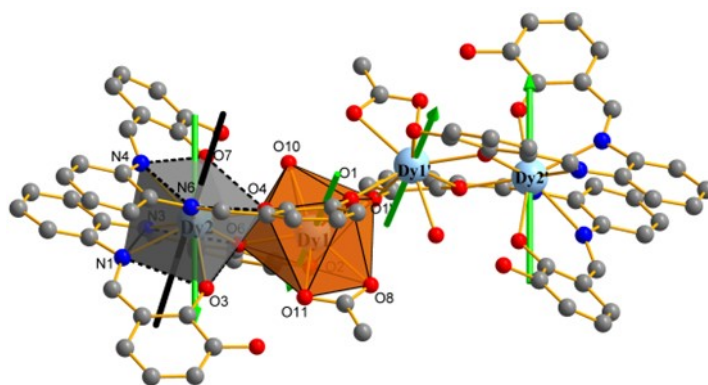

**Fig. S5** Estimated coordination polyhedral surrounding Dy2 (Square antiprism) and Dy1 (Triangular dodecahedron). The solid black line is the axis of symmetry of the pseudo square antiprism. Calculated orientations of the local main magnetic axes on Dy<sup>III</sup> ions of complex **1** in their ground KDs.

**Table S4** Continuous Shape Measures (CShMs) of the coordination geometry for Dy<sup>III</sup> ion in complex **1** (CShMs values calculated with the Shape program). The CShMs values indicated the proximity to the ideal polyhedron, thus, CShMs = 0 corresponds to the non-distorted polyhedron. The three closer ideal geometries to the real complexes are listed and below are the symmetry and description for each polyhedron.

|     | CShMs | Polyhedron                                 |
|-----|-------|--------------------------------------------|
| Dy1 | 1.491 | TDD-8 $D_{2d}$ Triangular dodecahedron     |
|     | 3.485 | BTPR-8 $C_{2v}$ Biaugmented trigonal prism |
|     | 3.577 | JSD-8 $D_{2d}$ Snub diphenoid J84          |
| Dy2 | 1.257 | SAPR-8 $D_{4d}$ Square antiprism           |
|     | 2.299 | TDD-8 $D_{2d}$ Triangular dodecahedron     |
|     | 2.518 | BTPR-8 $C_{2v}$ Biaugmented trigonal prism |

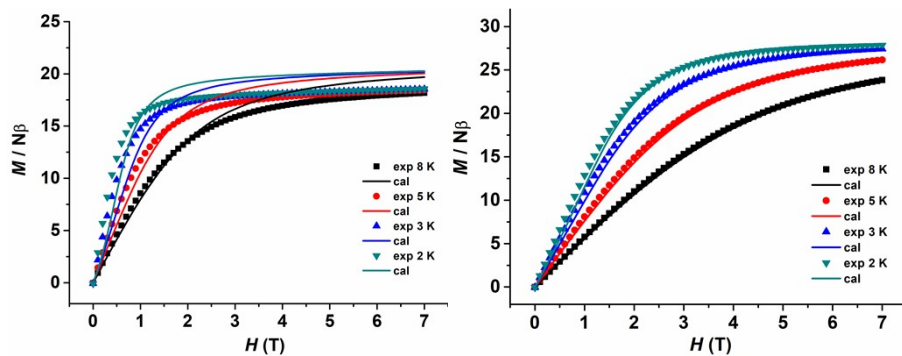

**Fig. S6** Field dependences of magnetization in the field range 0-70 kOe for complexes **1** and **2** at 2, 3, 5 and 8 K.

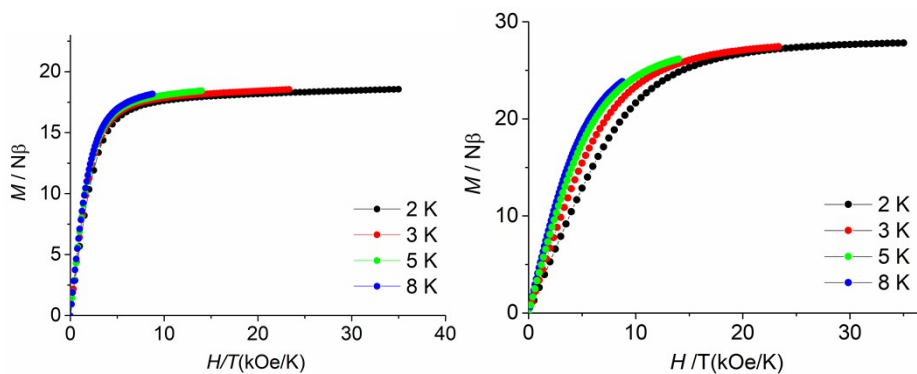

**Fig. S7** Magnetization  $M$  vs  $H/T$  curves of complexes **1** and **2** at 2, 3, 5 and 8 K.

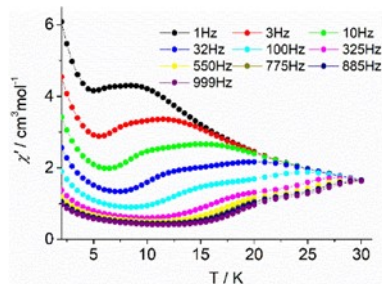

**Fig. S8** Temperature dependence of the in-phase ( $\chi'$ ) ac susceptibility in the temperature range 2-30 K of complex **1** under 0 Oe.

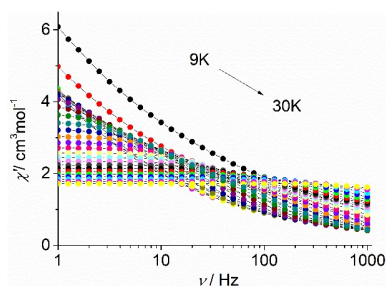

**Fig. S9** Frequency dependence of the in-phase ( $\chi'$ ) ac susceptibility in the temperature range 9-30 K of complex **1** under 0 Oe.



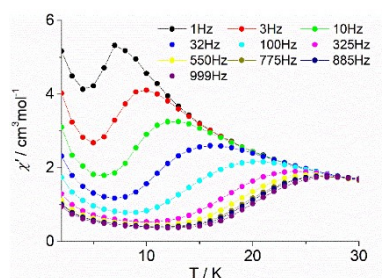

**Fig. S10** Temperature dependence of the in-phase ( $\chi'$ ) ac susceptibility in the temperature range 2-30 K of complex **1** under 1500 Oe.

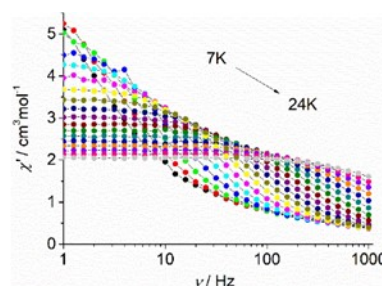

**Fig. S11** Frequency dependence of the in-phase ( $\chi'$ ) ac susceptibility in the temperature range 7-24 K of complex **1** under 1500 Oe.

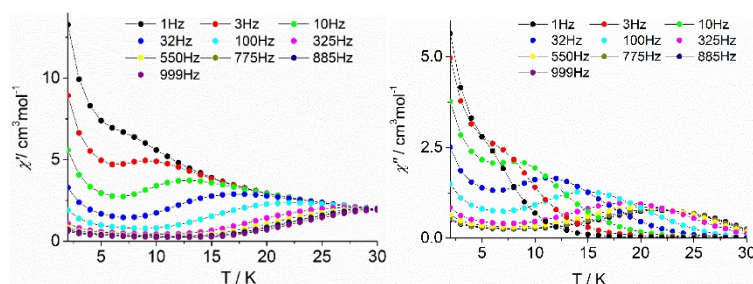

**Fig. S12** Temperature dependence of the in-phase ( $\chi'$ ) ac susceptibility (left) and the out-of-phase ( $\chi''$ ) ac susceptibility (right) in the temperature range 2-30 K of **1a** under 0 Oe.

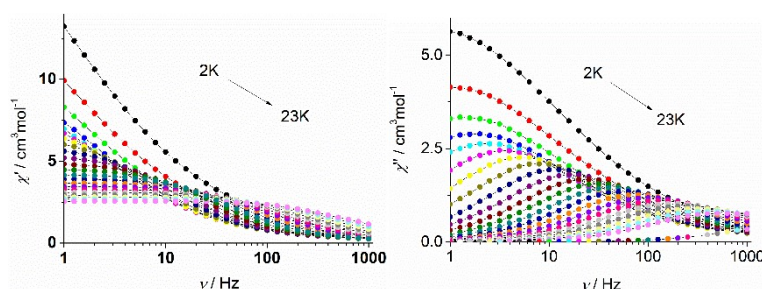

**Fig. S13** Frequency dependence of the in-phase ( $\chi'$ ) ac susceptibility (left) and the out-of-phase ( $\chi''$ ) ac susceptibility (right) in the temperature range 2-23 K of **1a** under 0 Oe.

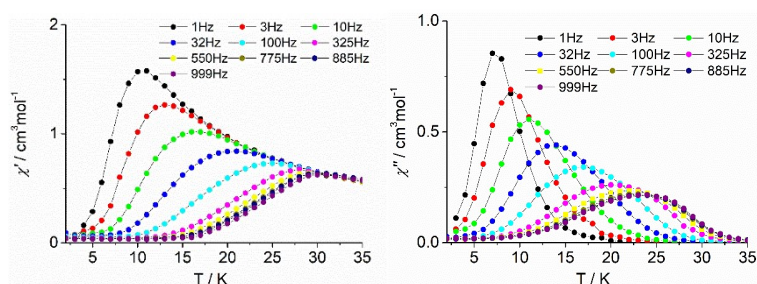

**Fig. S14** Temperature dependence of the in-phase ( $\chi'$ ) ac susceptibility (left) and the out-of-phase ( $\chi''$ ) ac susceptibility (right) in the temperature range 2-23 K of **1a** under 0 Oe.

susceptibility (right) in the temperature range 2-35 K of **1a** under 1500 Oe.

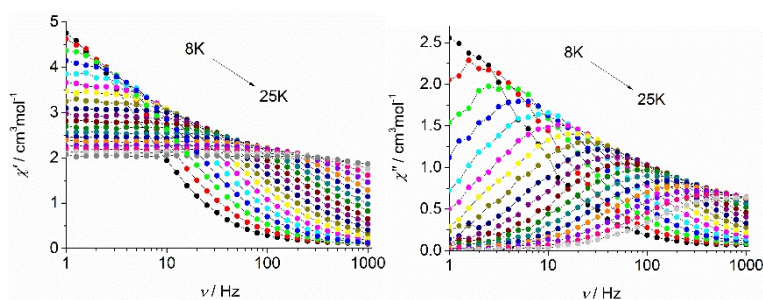

**Fig. S15** Frequency dependence of the in-phase ( $\chi'$ ) ac susceptibility (left) and the out-of-phase ( $\chi''$ ) ac susceptibility (right) in the temperature range 8-25 K of **1a** under 1500 Oe.

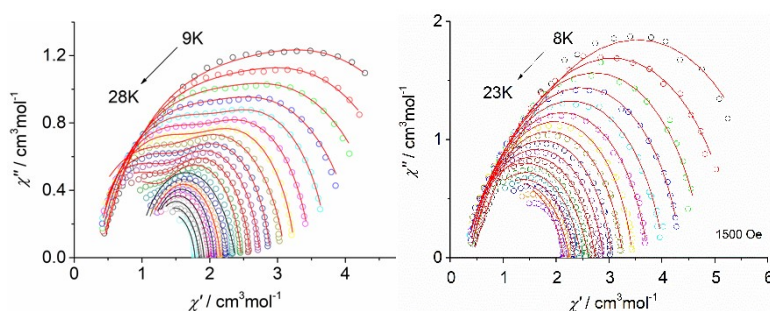

**Fig. S16** Cole-Cole plots for **1** under 0 Oe (left) and 1500 Oe (right). The solid lines are the best fit for the generalized Debye model.

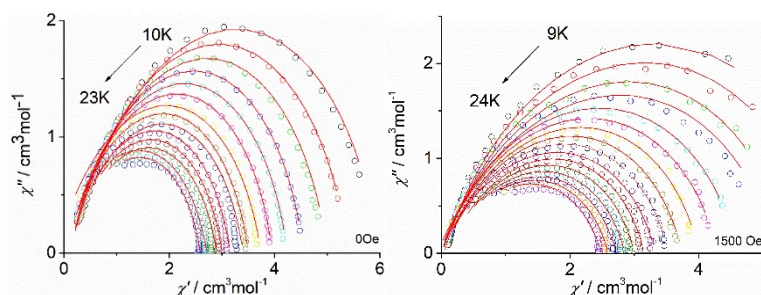

**Fig. S17** Cole-Cole plots for **1a** under 0 Oe (left) and 1500 Oe (right). The solid lines are the best fit for the generalized Debye model.

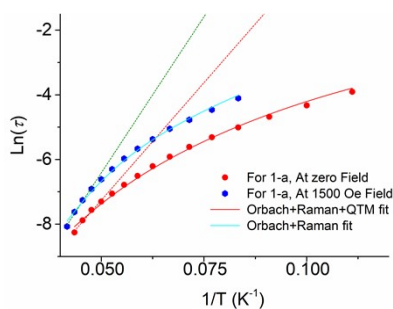

**Fig. S18**  $\ln(\tau)$  curves of  $1/T$  at 0 and 1500 Oe fields. The solid red line represents the fitting of frequency-dependent data by Eqn. (1) at 0 Oe dc field. The blue line represents the fitting of frequency-dependent data to **1a** using Eqn. (2) at 1500 Oe dc field. The dotted lines in green and red represent the pure Arrhenius fit of **1a** in the high-temperature linear region at 0 and 1500 Oe dc fields.

**Table S5** Best fitted parameters ( $\chi_S$ ,  $\chi_T$ ,  $\tau_1$ ,  $\tau_2$ ,  $\alpha_1$ ,  $\alpha_2$  and  $\beta$ ) with the extended Debye model featuring two relaxation times for complex **1** at 0 Oe in the temperature range 9-28 K.

| T/ K | $\chi_S / \text{cm}^3 \text{mol}^{-1}$ | $\chi_T / \text{cm}^3 \text{mol}^{-1}$ | $\tau_1/\text{s}$ | $\alpha_1$ | $\tau_2/\text{s}$ | $\alpha_2$ | $\beta$ |
|------|----------------------------------------|----------------------------------------|-------------------|------------|-------------------|------------|---------|
| 9    | 0.42934                                | 5.30892                                | 0.00622           | 0.23000    | 0.09187           | 0.35045    | 0.31000 |
| 10   | 0.38729                                | 4.70532                                | 0.00427           | 0.22996    | 0.06159           | 0.30578    | 0.36842 |
| 11   | 0.36425                                | 4.08197                                | 0.00344           | 0.23000    | 0.04840           | 0.17041    | 0.51613 |
| 12   | 0.17041                                | 3.72316                                | 0.00248           | 0.22988    | 0.03425           | 0.13226    | 0.55269 |
| 13   | 0.33279                                | 3.41852                                | 0.00159           | 0.19393    | 0.02257           | 0.13433    | 0.51662 |
| 14   | 0.28642                                | 3.20000                                | 0.00121           | 0.22447    | 0.01693           | 0.10993    | 0.56128 |
| 15   | 0.31016                                | 2.95005                                | 0.00080           | 0.18163    | 0.01157           | 0.11357    | 0.51759 |
| 16   | 0.27607                                | 2.80001                                | 0.00053           | 0.18626    | 0.00827           | 0.12534    | 0.50399 |
| 17   | 0.29486                                | 2.58360                                | 0.00046           | 0.22999    | 0.00687           | 0.06388    | 0.57830 |
| 18   | 0.33517                                | 2.38887                                | 0.00033           | 0.22998    | 0.00514           | 0.05801    | 0.56849 |
| 19   | 0.19602                                | 2.40006                                | 0.00014           | 0.23000    | 0.00269           | 0.10675    | 0.51773 |
| 20   | 0.33396                                | 2.13007                                | 0.00011           | 0.22981    | 0.00256           | 0.09168    | 0.50275 |
| 21   | 0.27766                                | 2.09790                                | 0.00000           | 0.23000    | 0.00113           | 0.21729    | 0.69735 |
| 22   | 0.25969                                | 2.00574                                | 0.00000           | 0.20266    | 0.00094           | 0.21100    | 0.64296 |
| 23   | 0.26541                                | 1.89460                                | 0.00000           | 0.22369    | 0.00079           | 0.15240    | 0.42212 |
| 24   | 0.04466                                | 2.02079                                | 0.00000           | 0.22312    | 0.00065           | 0.09891    | 0.55516 |
| 25   | 0.19691                                | 1.79274                                | 0.00000           | 0.13002    | 0.00040           | 0.38132    | 0.50535 |
| 26   | 0.08075                                | 1.83421                                | 0.00000           | 0.13001    | 0.00027           | 0.20936    | 0.45004 |
| 27   | 0.01063                                | 1.83555                                | 0.00000           | 0.13003    | 0.00018           | 0.28945    | 0.39620 |
| 28   | 0.05226                                | 1.72989                                | 0.00000           | 0.13000    | 0.00011           | 0.01288    | 0.35880 |

**Table S6** Best fitted parameters ( $\chi_T$ ,  $\chi_S$ ,  $\tau$  and  $\alpha$ ) with the extended Debye model for complex **1** at 1500 Oe in the temperature range 8-23 K.

| T/ K | $\chi_S / \text{cm}^3 \text{mol}^{-1}$ | $\chi_T / \text{cm}^3 \text{mol}^{-1}$ | $\tau/\text{s}$ | $\alpha$ |
|------|----------------------------------------|----------------------------------------|-----------------|----------|
| 8    | 0.41724                                | 6.19862                                | 0.04136         | 0.27663  |
| 9    | 0.34977                                | 5.40500                                | 0.02251         | 0.24998  |
| 10   | 0.35960                                | 4.79054                                | 0.01314         | 0.21678  |
| 11   | 0.32325                                | 4.37874                                | 0.00843         | 0.21366  |
| 12   | 0.27833                                | 4.03989                                | 0.00568         | 0.21772  |
| 13   | 0.27000                                | 3.73492                                | 0.00388         | 0.21428  |
| 14   | 0.32126                                | 3.44703                                | 0.00278         | 0.19032  |
| 15   | 0.27657                                | 3.26054                                | 0.00200         | 0.20832  |
| 16   | 0.25331                                | 3.05670                                | 0.00140         | 0.21524  |
| 17   | 0.20000                                | 2.89453                                | 0.00098         | 0.23705  |
| 18   | 0.19978                                | 2.73762                                | 0.00069         | 0.24466  |
| 19   | 0.00136                                | 2.61104                                | 0.00041         | 0.29913  |
| 20   | 0.19993                                | 2.47476                                | 0.00032         | 0.27978  |
| 21   | 0.19971                                | 2.36536                                | 0.00021         | 0.29985  |
| 22   | 0.19912                                | 2.25021                                | 0.00013         | 0.29772  |
| 23   | 0.08490                                | 2.15000                                | 0.00008         | 0.29900  |

**Table S7** Best fitted parameters ( $\chi_T$ ,  $\chi_S$ ,  $\tau$  and  $\alpha$ ) with the extended Debye model for **1a** at 0 Oe in the temperature range 10-23 K.

| T/ K | $\chi_S / \text{cm}^3 \text{mol}^{-1}$ | $\chi_T / \text{cm}^3 \text{mol}^{-1}$ | $\tau/\text{s}$ | $\alpha$ |
|------|----------------------------------------|----------------------------------------|-----------------|----------|
| 10   | 0.09993                                | 6.00001                                | 0.01426         | 0.26351  |
| 11   | 0.09937                                | 5.40199                                | 0.00974         | 0.24141  |
| 12   | 0.09965                                | 5.00008                                | 0.00711         | 0.23657  |
| 13   | 0.10000                                | 4.54777                                | 0.00496         | 0.21809  |
| 14   | 0.05024                                | 4.24061                                | 0.00361         | 0.22556  |
| 15   | 0.06869                                | 3.95476                                | 0.00270         | 0.21805  |
| 16   | 0.15046                                | 3.74274                                | 0.00186         | 0.26408  |
| 17   | 0.02936                                | 3.49873                                | 0.00149         | 0.22971  |
| 18   | 0.09991                                | 3.40018                                | 0.00123         | 0.24572  |
| 19   | 0.07827                                | 3.15082                                | 0.00086         | 0.23618  |
| 20   | 0.09905                                | 3.00003                                | 0.00064         | 0.24526  |
| 21   | 0.10000                                | 2.90019                                | 0.00049         | 0.26837  |
| 22   | 0.07171                                | 2.71374                                | 0.00031         | 0.28031  |
| 23   | 0.09953                                | 2.58948                                | 0.00025         | 0.25674  |

**Table S8** Best fitted parameters ( $\chi_T$ ,  $\chi_S$ ,  $\tau$  and  $\alpha$ ) with the extended Debye model for **1a** at 1500 Oe in the temperature range 9-24 K.

| T/ K | $\chi_S / \text{cm}^3 \text{mol}^{-1}$ | $\chi_T / \text{cm}^3 \text{mol}^{-1}$ | $\tau/\text{s}$ | $\alpha$ |
|------|----------------------------------------|----------------------------------------|-----------------|----------|
| 9    | 0.04463                                | 6.19995                                | 0.07752         | 0.20774  |
| 10   | 0.00946                                | 5.90020                                | 0.05019         | 0.23803  |
| 11   | 0.00697                                | 5.40891                                | 0.03139         | 0.25047  |
| 12   | 0.05912                                | 5.20034                                | 0.02170         | 0.28110  |
| 13   | 0.02367                                | 4.59964                                | 0.01316         | 0.25588  |
| 14   | 0.01963                                | 4.28759                                | 0.00897         | 0.25744  |
| 15   | 0.02512                                | 4.00213                                | 0.00629         | 0.25106  |
| 16   | 0.03311                                | 3.73565                                | 0.00441         | 0.25127  |
| 17   | 0.03921                                | 3.52582                                | 0.00316         | 0.25778  |
| 18   | 0.00504                                | 3.32428                                | 0.00221         | 0.27499  |
| 19   | 0.09767                                | 3.15008                                | 0.00167         | 0.26514  |
| 20   | 0.10000                                | 3.00000                                | 0.00120         | 0.27618  |
| 21   | 0.09796                                | 2.85286                                | 0.00083         | 0.28817  |
| 22   | 0.09885                                | 2.71940                                | 0.00057         | 0.29684  |
| 23   | 0.11287                                | 2.59190                                | 0.00040         | 0.29320  |
| 24   | 0.09548                                | 2.48243                                | 0.00026         | 0.29976  |

**Table S9** The shortest Dy-O bond lengths of some reported Dy<sup>III</sup> tetranuclear complexes.

| Complex                                                                                                        | The shortest Dy-O bond (Å) |
|----------------------------------------------------------------------------------------------------------------|----------------------------|
| $[\text{Dy}_4(\text{HL})_4(\text{OAc})_2(\text{H}_2\text{O})_2] \cdot (\text{Et}_3\text{NH})_2$                | 2.241                      |
| $[(\text{Cp}^*_2\text{Dy})_4(\text{tz})_4] \cdot 3(\text{C}_6\text{H}_6)$                                      | No Dy-O bond               |
| $[\text{Dy}_4(\text{L})_2(\text{OAc})_8(\text{CH}_3\text{OH})_2]$                                              | 2.169                      |
| $[\text{Dy}_4(\mu_3\text{-OH})_2\text{L}_6(\text{acac})_4] \cdot 2.5\text{CH}_3\text{CN}$                      | 2.285                      |
| $[\text{Dy}_4(\mu_3\text{-OH})_2\text{L}_6(\text{tmhd})_4] \cdot 2\text{CH}_3\text{CN}$                        | 2.285                      |
| $[\text{Dy}_4(\mu_3\text{-OH})_2\text{L}_6(\text{beac})_4] \text{CH}_3\text{CN}$                               | 2.232                      |
| $[\text{Dy}_4(\text{vht})_4(\text{MeOH})_8](\text{NO}_3)_4 \cdot 8.07\text{MeOH} \cdot 0.65\text{H}_2\text{O}$ | 2.206                      |

|                                                                                                                                                                |       |
|----------------------------------------------------------------------------------------------------------------------------------------------------------------|-------|
| $[\text{Dy}_4(\text{bzhdep-2H})_4(\text{H}_2\text{O})_4(\text{NO}_3)_4] \cdot 6\text{CH}_3\text{OH} \cdot 6\text{H}_2\text{O}$                                 | 2.289 |
| $[\text{Dy}_4(\text{OH})_2(\text{bpt})_4(\text{NO}_3)_4(\text{OAc})_2]$                                                                                        | 2.211 |
| $[\text{Dy}_4\text{Cl}_2(\mu_3\text{-OH})_2(\mu\text{-OH})_2(2,2\text{-bpt})_4(\text{H}_2\text{O})_4]\text{Cl}_2 \cdot 2\text{H}_2\text{O} \cdot 4\text{EtOH}$ | 2.252 |
| $[\text{Dy}_4\text{Br}_2(\mu_3\text{-OH})_2(\mu\text{-OH})_2(2,2\text{-bpt})_4(\text{H}_2\text{O})_4]\text{Cl}_2 \cdot 2\text{H}_2\text{O} \cdot 4\text{EtOH}$ | 2.243 |
| $[\text{Dy}_4(\text{HL})_2(\text{L})_4(\mu_3\text{-OH})_2] 5(\text{MeOH})_2 \cdot 7\text{H}_2\text{O}$                                                         | 2.327 |
| $[\text{Dy}_4(\mu_3\text{-bpt})_4(\mu_3\text{-OH})_2(\mu\text{-OMe})_2(\text{NO}_3)_4] \cdot 3\text{MeOH}$                                                     | 2.322 |
| $[\text{Dy}_4(\mu_3\text{-OH})_2(\text{mdeaH})_2(\text{piv})_8]$                                                                                               | 2.370 |
| $[\text{Dy}_4(\mu_3\text{-OH})_2(\text{bmh})_2(\text{msh})_4\text{Cl}_2]$                                                                                      | 2.298 |
| $[\text{Dy}_4\text{L}_2(\text{HL})_2(\mu_3\text{-OH})_2(\text{NO}_3)_2](\text{NO}_3)_2 \cdot 3\text{CH}_3\text{CN} \cdot 5\text{H}_2\text{O}$                  | 2.308 |

**Table S10** Energy barriers were obtained from the Arrhenius law fitting and Equation 1 of the out-of-phase ( $\chi''$ ) ac susceptibility data under zero dc field.

| Relaxation processes | Orbach processes         |                      | Raman, QTM and Orbach processes |                                             |     |                          |                       |
|----------------------|--------------------------|----------------------|---------------------------------|---------------------------------------------|-----|--------------------------|-----------------------|
|                      | $U_{\text{eff}}/k_B$ (K) | $\tau_0$ (s)         | q                               | $C$ ( $\text{s}^{-1} \cdot \text{K}^{-n}$ ) | n   | $U_{\text{eff}}/k_B$ (K) | $\tau_0$ (s)          |
| <b>1</b>             | 175(27)                  | $1.7 \times 10^{-8}$ | 1.7                             | 0.1                                         | 3.5 | 207(2)                   | $5.1 \times 10^{-9}$  |
|                      | 319(11)                  | $1.3 \times 10^{-9}$ | 0.3                             | $2.3 \times 10^{-4}$                        | 4.8 | 353(3)                   | $4.6 \times 10^{-10}$ |
| <b>1a</b>            | 151(14)                  | $3.5 \times 10^{-7}$ | 1.5                             | $9.3 \times 10^{-3}$                        | 3.9 | 193(3)                   | $1.1 \times 10^{-7}$  |

**Table S11** Energy barriers were obtained from the Arrhenius law fitting and Equation 2 of the out-of-phase ( $\chi''$ ) ac susceptibility data under 1500 Oe dc field.

| Relaxation processes | Orbach processes         |                      | Raman and Orbach processes                  |     |                          |                      |
|----------------------|--------------------------|----------------------|---------------------------------------------|-----|--------------------------|----------------------|
|                      | $U_{\text{eff}}/k_B$ (K) | $\tau_0$ (s)         | $C$ ( $\text{s}^{-1} \cdot \text{K}^{-n}$ ) | n   | $U_{\text{eff}}/k_B$ (K) | $\tau_0$ (s)         |
| <b>1</b>             | 213(11)                  | $7.9 \times 10^{-9}$ | $1.7 \times 10^{-3}$                        | 4.6 | 245(1)                   | $3.0 \times 10^{-9}$ |
| <b>1a</b>            | 193(14)                  | $1.0 \times 10^{-7}$ | $1.2 \times 10^{-3}$                        | 4.3 | 230(1)                   | $4.1 \times 10^{-8}$ |

### Computational detail

For tetranuclear complex **1**, we only need to calculate two types of individual Dy<sup>III</sup> fragments (Dy1 and Dy2) due to the centrosymmetric structure (see Fig. S19). Complete-active-space self-consistent field (CASSCF) calculations on individual Dy<sup>III</sup> fragments have been carried out with OpenMolcas<sup>S1</sup> program package. Each of individual Dy<sup>III</sup> fragments in complex **1** was calculated keeping the experimentally determined structures of the corresponding compounds while replacing the other Dy<sup>III</sup> ions with diamagnetic Lu<sup>III</sup>.

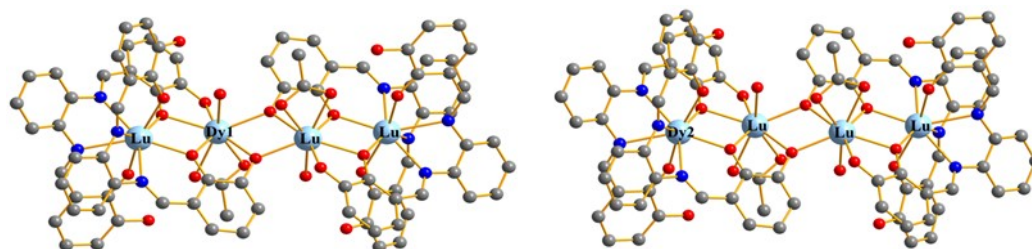

**Fig. S19** Calculated model structures of individual Dy<sup>III</sup> fragments of complex **1**; H atoms are omitted for clarity.

The basis sets for all atoms are atomic natural orbitals from the ANO-RCC library: ANO-RCC-VTZP for Dy<sup>III</sup>; VTZ for close N and O; VDZ for distant atoms. The calculations employed the second order Douglas-Kroll-Hess Hamiltonian, where scalar relativistic contractions were taken into account in the basis set and the spin-orbit couplings were handled separately in the restricted active space state interaction (RASSI-SO) procedure.<sup>S2, S3</sup> For each individual Dy<sup>III</sup> fragment, active electrons in 7 active orbitals include all *f* electrons (CAS(9 in 7 for Dy<sup>III</sup>)) in

the CASSCF calculation. To exclude all the doubts, we calculated all the roots in the active space. We have mixed the maximum number of spin-free state which was possible with our hardware (all from 21 sextets, 128 from 224 quadruplets, 130 from 490 doublets) for each fragment. SINGLE\_ANISO<sup>54-56</sup> program was used to obtain the energy levels,  $g$  tensors, magnetic axes, *et al.* based on the above CASSCF/RASSI-SO calculations.

**Table S12** Calculated energy levels ( $\text{cm}^{-1}$ ),  $g$  ( $g_x, g_y, g_z$ ) tensors and predominant  $m_j$  values of the lowest eight Kramers doublets (KDs) of individual Dy<sup>III</sup> fragments for complex **1** using CASSCF/RASSI-SO with OpenMolcas.

| KDs | Dy1   |                          |            | Dy2   |                          |            |
|-----|-------|--------------------------|------------|-------|--------------------------|------------|
|     | $E$   | $g$                      | $m_j$      | $E$   | $g$                      | $m_j$      |
| 1   | 0.0   | 0.002<br>0.004<br>19.645 | $\pm 15/2$ | 0.0   | 0.005<br>0.006<br>19.791 | $\pm 15/2$ |
| 2   | 197.1 | 0.016<br>0.036<br>16.630 | $\pm 13/2$ | 181.5 | 0.063<br>0.111<br>16.967 | $\pm 13/2$ |
| 3   | 351.4 | 1.071<br>2.629<br>10.831 | $\pm 11/2$ | 312.5 | 3.372<br>4.095<br>13.735 | $\pm 1/2$  |
| 4   | 384.7 | 10.375<br>5.976<br>1.448 | $\pm 1/2$  | 356.7 | 7.557<br>5.459<br>0.506  | $\pm 11/2$ |
| 5   | 430.6 | 11.057<br>6.116<br>1.102 | $\pm 3/2$  | 404.2 | 2.289<br>4.760<br>11.182 | $\pm 3/2$  |
| 6   | 480.7 | 1.531<br>2.604<br>14.690 | $\pm 9/2$  | 517.2 | 3.707<br>5.062<br>8.662  | $\pm 5/2$  |
| 7   | 544.9 | 0.088<br>0.304<br>17.822 | $\pm 7/2$  | 572.2 | 0.844<br>3.816<br>6.800  | $\pm 7/2$  |
| 8   | 609.5 | 0.111<br>0.284<br>19.143 | $\pm 7/2$  | 609.0 | 12.218<br>7.229<br>1.168 | $\pm 9/2$  |

**Table S13** Wave functions with definite projection of the total moment  $|m_j\rangle$  for the lowest eight KDs of individual Dy<sup>III</sup> fragments for complex **1** using CASSCF/RASSI-SO with OpenMolcas.

|            | $E/\text{cm}^{-1}$ | wave functions                                                                                        |
|------------|--------------------|-------------------------------------------------------------------------------------------------------|
| <b>Dy1</b> | 0.0                | 96.1% $ \pm 15/2\rangle$                                                                              |
|            | 197.1              | 87.3% $ \pm 13/2\rangle$ + 8.6% $ \pm 9/2\rangle$                                                     |
|            | 351.4              | 49.6% $ \pm 11/2\rangle$ + 17.5% $ \pm 7/2\rangle$ + 14.4% $ \pm 3/2\rangle$ + 9.7% $ \pm 1/2\rangle$ |

|            |       |                                                                           |
|------------|-------|---------------------------------------------------------------------------|
|            | 384.7 | 54%  ±1/2>+12.9%  ±3/2>+10.5%  ±5/2>+7.8%  ±11/2>+6.2%  ±9/2>             |
|            | 430.6 | 34.5%  ±3/2>+33.2%  ±5/2>+13.8%  ±11/2>+13.6%  ±9/2>                      |
|            | 480.7 | 28%  ±9/2>+18.1%  ±7/2>+16%  ±1/2>+15.6%  ±3/2>+10.5%  ±5/2>+9.3%  ±11/2> |
|            | 544.9 | 25.2%  ±7/2>+20.9%  ±5/2>+17.4%  ±9/2>+16.9%  ±1/2>+14.3%  ±3/2>          |
|            | 609.5 | 32.4%  ±7/2>+25.4%  ±9/2>+20.2%  ±5/2>+9.9%  ±11/2>+7.9%  ±3/2>           |
| <b>Dy2</b> | 0.0   | 98.9%  ±15/2>                                                             |
|            | 181.5 | 89.9%  ±13/2>+6%  ±11/2>                                                  |
|            | 312.5 | 52.2%  ±1/2>+18.5%  ±11/2>+14.3%  ±3/2>+10.1%  ±5/2>                      |
|            | 356.7 | 32.9%  ±11/2>+21.8%  ±3/2>+15.3%  ±9/2>+15.3%  ±1/2>+10.4%  ±5/2>         |
|            | 404.2 | 40.8%  ±3/2>+21.7%  ±1/2>+14%  ±7/2>+11.8%  ±9/2>+5.8%  ±11/2>            |
|            | 517.2 | 56.3%  ±5/2>+23.8%  ±11/2>+9.3%  ±7/2>+3.7%  ±13/2>                       |
|            | 572.2 | 39.8%  ±7/2>+24.7%  ±9/2>+15.5%  ±3/2>+10.1%  ±11/2>                      |
|            | 609.0 | 42.3%  ±9/2>+31.8%  ±7/2>+10.5%  ±5/2>+8.7%  ±1/2>                        |

To fit the exchange interactions between Dy<sup>III</sup> ions in complex **1**, we took two steps to obtain them. Firstly, we calculated individual Dy<sup>III</sup> fragments using CASSCF/RASSI-SO to obtain the corresponding magnetic properties. Then, the exchange interaction between the magnetic centers was considered within the Lines model,<sup>57</sup> while the account of the dipole-dipole magnetic coupling is treated exactly. The Lines model is effective and has been successfully used widely in the research field of *d* and *f*-elements single-molecule magnets.<sup>58, 59</sup>

For complex **1**, we only consider the interactions between the nearest neighbour Dy<sup>III</sup> ions. Thus, there only exist two types of  $\tilde{J}$ .

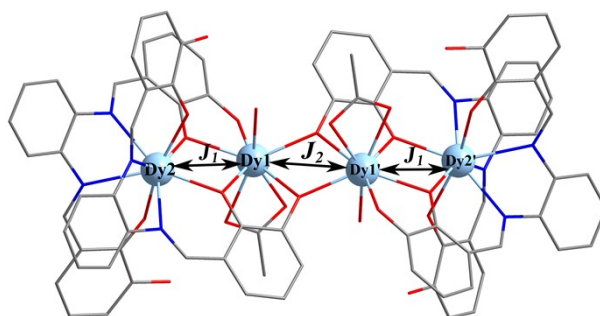

**Fig. S20** Scheme of the Dy<sup>III</sup>-Dy<sup>III</sup> interactions in complex **1**.

The Ising exchange Hamiltonian for **1** is:

$$\hat{H}_{exch} = -\tilde{J}_1 \hat{S}_{Dy1} \hat{S}_{Dy2} - \tilde{J}_2 \hat{S}_{Dy1} \hat{S}_{Dy1'} \quad (S1)$$

where  $\tilde{J}_1 = 25 \cos \varphi J_1$ ,  $\varphi$  is the angle between the anisotropy axes on sites Dy1 and Dy2, and  $J_1$  is the Lines

exchange coupling parameter.  $\tilde{J}_2$  also has the similar expression. The  $S_{Dy}^0 = 1/2$  is the ground pseudospin on the Dy<sup>III</sup> site. The total  $\tilde{J}_{total}$  is the parameter of the total magnetic interaction ( $\tilde{J}_{total} = \tilde{J}_{dipolar} + \tilde{J}_{exchange}$ ) between magnetic center ions. The dipolar magnetic couplings can be calculated exactly, while the Lines exchange coupling constants were fitted through comparison of the computed and measured magnetic susceptibilities using the POLY\_ANISO program.<sup>54-56</sup>

**Table S14.** Fitted exchange coupling constant  $\%_{exch}$  (cm<sup>-1</sup>) through comparison of the computed and measured magnetic susceptibilities ( $\chi_M T-T$ ) and magnetic hysteresis (*M-H*), respectively, the calculated dipole-dipole interaction  $\%_{dip}$  and  $\%_{total}$  (cm<sup>-1</sup>) between magnetic center ions in **1**. The intermolecular interaction  $zJ'$  of **1** was fitted to 0.01 and -0.01 cm<sup>-1</sup> for  $\chi_M T-T$  and *M-H*, respectively.

|              |       | $\%_{exch}$ | $\%_{dip}$ | $\%_{total}$ |
|--------------|-------|-------------|------------|--------------|
| $\chi_M T-T$ | $J_1$ | -2.3        | -0.6       | -2.9         |
|              | $J_2$ | -4.5        | 0.8        | -3.7         |
| <i>M-H</i>   | $J_1$ | -1.4        | -0.6       | -2.0         |
|              | $J_2$ | -5.0        | 0.8        | -4.2         |

We gave the exchange energies ( $\text{cm}^{-1}$ ), the energy differences between each exchange doublet  $\Delta_t$  ( $\text{cm}^{-1}$ ) and the main values of the  $g_z$  for the lowest eight exchange doublets of **1** in Table S15. The  $g_z$  value of the ground exchange state of **1** is 0.000, which confirms that the  $\text{Dy}^{\text{III}}\text{-Dy}^{\text{III}}$  interactions in **1** are all antiferromagnetic.

**Table S15.** Exchange energies  $E$  ( $\text{cm}^{-1}$ ), the energy difference between each exchange doublets  $\Delta_t$  ( $\text{cm}^{-1}$ ) and the main values of the  $g_z$  for the lowest eight exchange doublets of complex **1**.

| <i>M-H</i>        |                |                         |        |
|-------------------|----------------|-------------------------|--------|
| exchange doublets | $E$            | $\Delta_t$              | $g_z$  |
| 1                 | 0.000000000000 | $1.300 \times 10^{-11}$ | 0.000  |
|                   | 0.000000000013 |                         |        |
| 2                 | 2.142895749844 | $3.530 \times 10^{-10}$ | 39.577 |
|                   | 2.142895750197 |                         |        |
| 3                 | 2.218523208370 | $4.200 \times 10^{-11}$ | 0.004  |
|                   | 2.218523208412 |                         |        |
| 4                 | 3.137172429161 | $3.250 \times 10^{-10}$ | 39.581 |
|                   | 3.137172429486 |                         |        |
| 5                 | 4.442156938476 | $5.550 \times 10^{-10}$ | 39.289 |
|                   | 4.442156939026 |                         |        |
| 6                 | 5.436512804906 | $4.950 \times 10^{-10}$ | 39.289 |
|                   | 5.436512805401 |                         |        |
| 7                 | 6.342320455299 | $8.620 \times 10^{-10}$ | 50.565 |
|                   | 6.342320456161 |                         |        |
| 8                 | 6.597909054517 | $1.840 \times 10^{-10}$ | 60.530 |
|                   | 6.597909054701 |                         |        |

For complex **2**, there are two types of J.

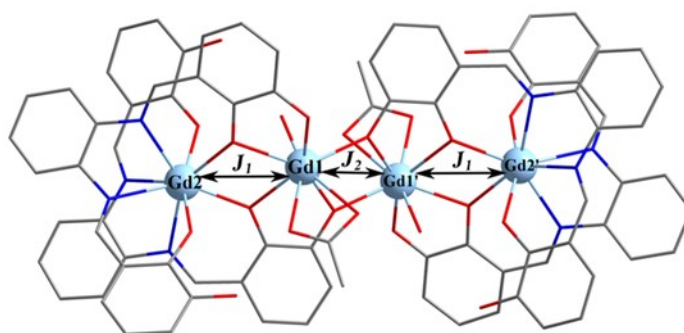

**Fig. S21** Scheme of the  $\text{Gd}^{\text{III}}\text{-Gd}^{\text{III}}$  interactions in complex **2**.

The Isotropic exchange Hamiltonian is:

$$\hat{H}_{exch} = -J_1(S_{Gd1}S_{Gd2} + S_{Gd1'}S_{Gd2'}) - J_2S_{Gd1}S_{Gd1'} \quad (1)$$

$J_1$  and  $J_2$  are the parameters of the total magnetic coupling constants between the magnetic centers.  $S_{Gd} = 7/2$  is the ground spin on the  $\text{Gd}^{\text{III}}$  ions. The Lines exchange coupling constants  $J_1$  and  $J_2$  were fitted through comparison of the computed and measured magnetic susceptibilities using the POLY\_ANISO program.



**Table S16.** Fitted the total magnetic coupling parameters  $J_1$  and  $J_2$  ( $\text{cm}^{-1}$ ) through comparison of the computed and measured magnetic susceptibilities ( $\chi_M T-T$ ) and magnetic hysteresis ( $M-H$ ) respectively between magnetic center ions in **2**. The intermolecular interaction  $zJ'$  of **2** was fitted to  $-0.01$  and  $-0.02$   $\text{cm}^{-1}$  for  $\chi_M T-T$  and  $M-H$ , respectively.

|              | $J_1$ | $J_2$ |
|--------------|-------|-------|
| $\chi_M T-T$ | -0.15 | -0.14 |
| $M-H$        | -0.22 | -0.22 |

**References:**

- S1 Galván, I. F.; Vacher, M.; Alavi, A.; Angeli, C.; Aquilante, F.; Autschbach, J.; Bao, J. J.; Bokarev, S. I.; Bogdanov, N. A.; Carlson, R. K.; Chibotaru, L. F.; Creutzberg, J.; Dattani, N.; Delcey, M. G.; Dong, S. S.; Dreuw, A.; Freitag, L.; Frutos, L. M.; Gagliardi, L.; Gendron, F.; Giussani, A.; González, L.; Grell, G.; Guo, M. Y.; Hoyer, C. E.; Johansson, M.; Keller, S.; Knecht, S.; Kovacevic, G.; Källman, E.; Manni, G. L.; Lundberg, M.; Ma, Y. J.; Mai, S.; Malhado, J. P.; Malmqvist, P. Å.; Marquetand, P.; Mewes, S. A.; Norell, J.; Olivucci, M.; Oppel, M.; Phung, Q. M.; Pierloot, K.; Plasser, F.; Reiher, M.; Sand, A. M.; Schapiro, I.; Sharma, P.; Stein, C. J.; Sørensen, L. K.; Truhlar, D. G.; Ugandi, M.; Ungur, L.; Valentini, A.; Vancoillie, S.; Velyazov, V.; Weser, O.; Wesolowski, T. A.; Widmark, Per-Olof.; Wouters, S.; Zech, A.; Zobel, J. P.; Lindh. R. *J. Chem. Theory Comput.* **2019**, *15*, 5925–5964.
- S2 Malmqvist, P. Å.; Roos, B. O.; Schimmelpfennig, B. *Chem. Phys. Lett.*, **2002**, *357*, 230–240.
- S3 Heß, B. A.; Marian, C. M.; Wahlgren, U.; Gropen, O. *Chem. Phys. Lett.*, **1996**, *251*, 365–371.
- S4 Chibotaru, L. F.; Ungur, L.; Soncini, A. *Angew. Chem., Int. Ed.* **2008**, *47*, 4126–4129.
- S5 Ungur, L.; Van den Heuvel, W.; Chibotaru, L. F. *New J. Chem.* **2009**, *33*, 1224–1230.
- S6 Chibotaru, L. F.; Ungur, L.; Aronica, C.; Elmoll, H.; Pilet, G.; Luneau, D. *J. Am. Chem. Soc.* **2008**, *130*, 12445–12455.
- S7 Lines, M. E. *J. Chem. Phys.* **1971**, *55*, 2977–2984.
- S8 Mondal, K. C.; Sundt, A.; Lan, Y. H.; Kostakis, G. E.; Waldmann, O.; Ungur, L.; Chibotaru, L. F.; Anson, C. E.; Powell, A. K. *Angew. Chem., Int. Ed.* **2012**, *51*, 7550–7554.
- S9 Langley, S. K.; Wielechowski, D. P.; Vieru, V.; Chilton, N. F.; Moubaraki, B.; Abrahams, B. F.; Chibotaru, L. F.; Murray, K. S. *Angew. Chem., Int. Ed.* **2013**, *52*, 12014–12019.
